# Supplementary material for: Insulin-like growth factor 2 mRNA-binding protein 3 promotes kidney injury by regulating β-catenin signaling
Source: JCI journal article supplement (doi:10.1172/jci.insight.162060), 2022-12-15
Supplement: sd1 [file 1]

You are being redirected.
