# Supplementary material for: Insulin-like growth factor 2 mRNA-binding protein 3 promotes kidney injury by regulating β-catenin signaling
Source: JCI journal article supplement (doi:10.1172/jci.insight.162060), 2022-12-15
Supplement: sd1 [file 1]

# Insulin-like growth factor 2 mRNA-binding protein 3 promotes kidney injury by regulating $\beta$ -catenin signaling

Dongyan Song<sup>1,2</sup>, Jingyue Shang<sup>1,2</sup>, Yinyi Long<sup>1</sup>, Menghua Zhong<sup>1</sup>, Li Li<sup>1</sup>, Jiongcheng Chen<sup>1</sup>, Yadie Xiang<sup>1</sup>, Huishi Tan<sup>1</sup>, Haili Zhu<sup>1</sup>, Xue Hong<sup>1</sup>, Fan Fan Hou<sup>1</sup>, Haiyan Fu<sup>1</sup>, Youhua Liu<sup>1</sup>

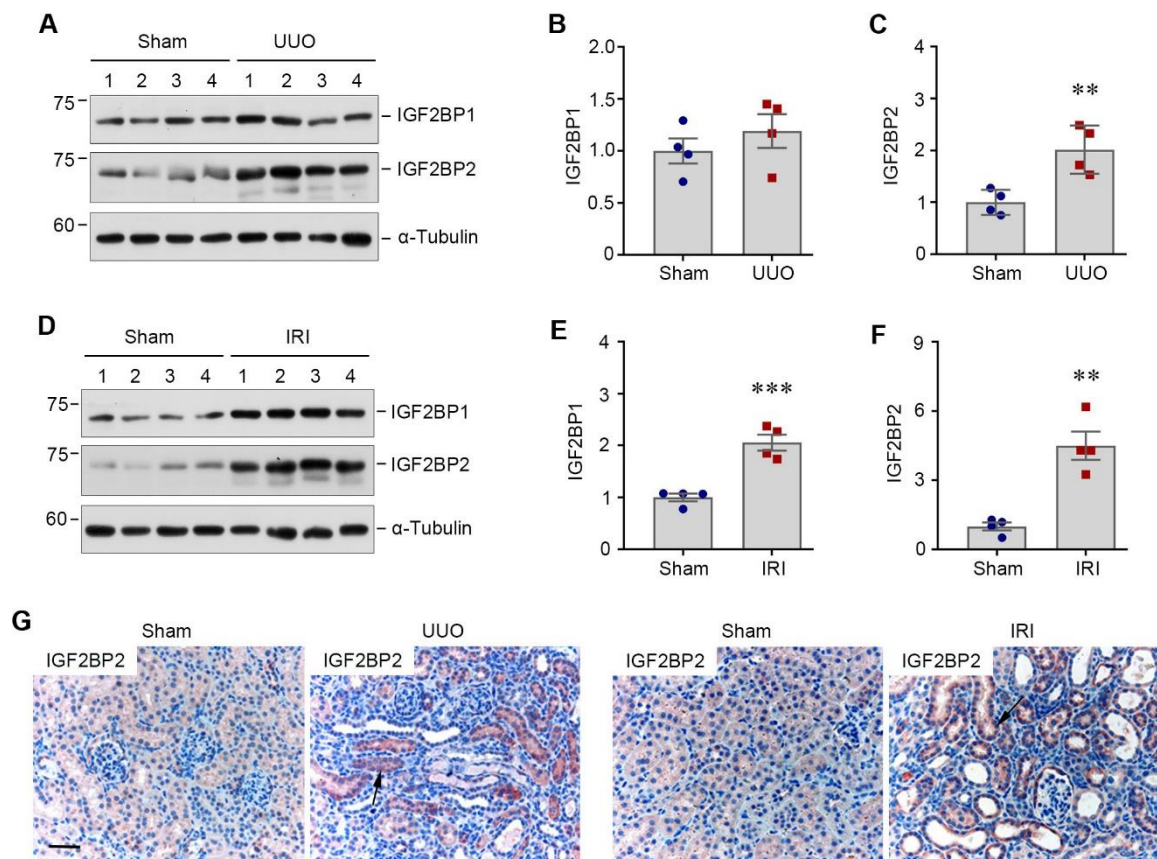

**Figure S1. Renal expression of IGF2BP1 and IGF2BP2 in various models of CKD.** (A-C) Western blot analyses (A) and quantitative determination of renal IGF2BP1 (B) and IGF2BP2 (C) after UUO. IGF2BP1 and IGF2BP2 expression were assessed in the kidneys at 7 days after UUO.  $**P < 0.01$  versus sham (n=4, *t* test). (D-F) Western blot analyses (D) and quantitative determination of renal IGF2BP1 (E) and IGF2BP2 (F) after IRI. IGF2BP1 and IGF2BP2 expression were assessed at 11 days after IRI.  $**P < 0.01$ ,  $***P < 0.001$  versus sham (n=4, *t* test). (G) Representative micrographs show renal expression and localization of IGF2BP2 protein in various animal models of CKD. IGF2BP2 was detected by immunohistochemical staining. Arrows indicated positive staining. Scale bar, 50  $\mu$ m.

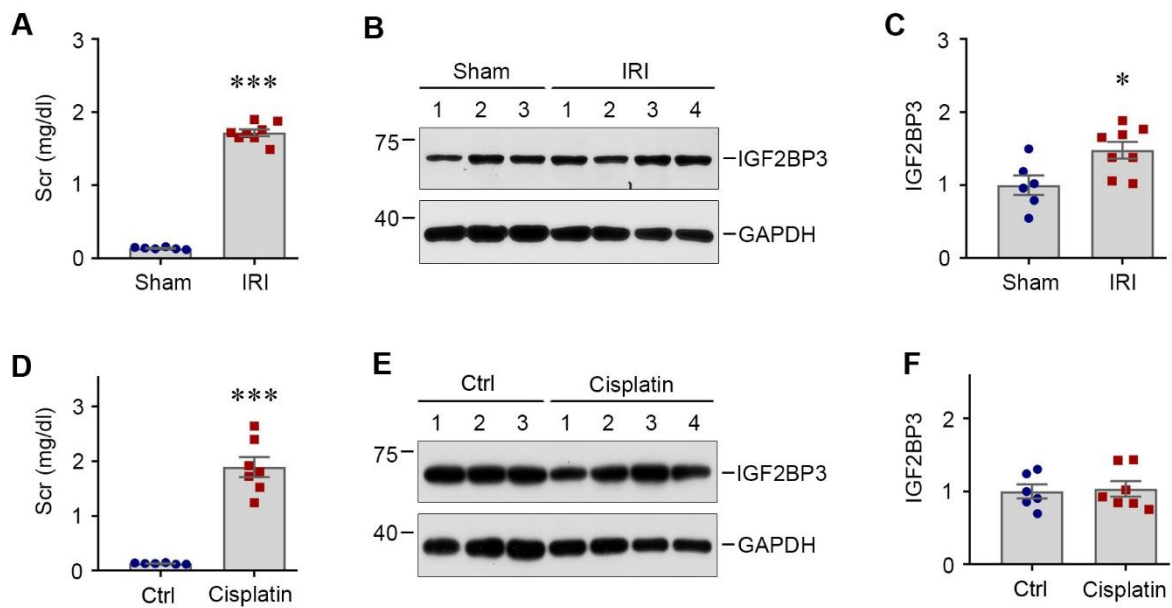

**Figure S2. Renal expression of IGF2BP3 in mouse models of AKI.** (A) Graphic presentation shows Scr levels after IRI. \*\*\* $P < 0.001$  versus sham (n = 6-8,  $t$  test). (B and C) Western blot analyses (B) and quantitative determination (C) of renal IGF2BP3 protein after IRI. IGF2BP3 expression was assessed in the kidneys at 24 h after IRI. \* $P < 0.05$  versus sham (n = 6-8,  $t$  test). (D) Graphic presentation shows Scr levels after cisplatin injection. \*\*\* $P < 0.001$  versus sham (n = 6-7,  $t$  test). (E and F) Western blot analyses (E) and quantitative determination (F) of renal IGF2BP3 protein after cisplatin injury. IGF2BP3 expression was assessed in the kidneys at 3 days after cisplatin (n = 6-7,  $t$  test).

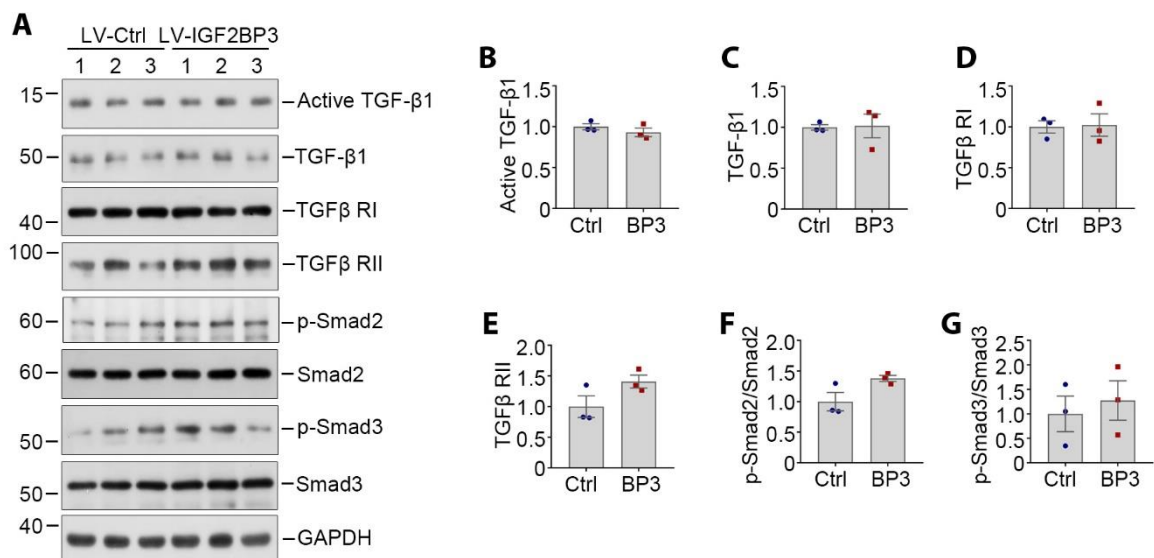

**Figure S3. Overexpression of IGF2BP3 has little effect on TGF- $\beta$  signaling in vitro.** (A) HKC-8 cells were infected with either control lentivirus or IGF2BP3 lentivirus overnight, and then incubated for 2 days as indicated. Representative Western blots (A) and quantitative data show the expression of active TGF- $\beta$ 1 (B), TGF- $\beta$ 1 (C), TGF- $\beta$  RI (D), TGF- $\beta$  RII (E), p-Smad2/Smad2 (F), and p-Smad3/Smad3 (G) in different groups as indicated (n=3, *t* test).

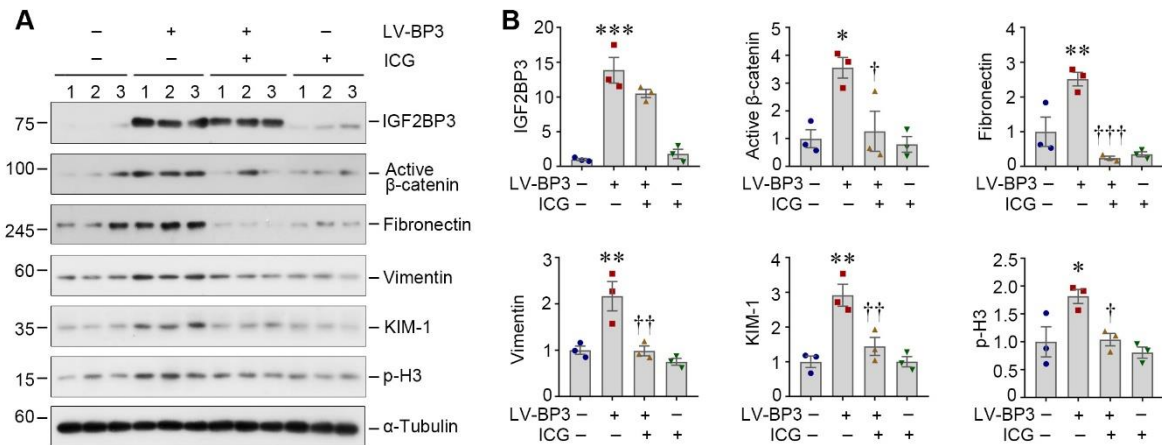

**Figure S4. The effects of IGF2BP3 overexpression are mediated by  $\beta$ -catenin activation in vitro.** HKC-8 cells were infected with either control lentivirus or IGF2BP3 lentivirus overnight, and then incubated with ICG-001 (10  $\mu$ M) for 2 days as indicated. Representative Western blots (A) and quantitative data (B) show the expression of IGF2BP3, active  $\beta$ -catenin, fibronectin, vimentin, KIM-1, and p-H3 in different groups as indicated. \**P* < 0.05, \*\**P* < 0.01, \*\*\**P* < 0.001 versus controls; †*P* < 0.05, ††*P* < 0.01, †††*P* < 0.001 versus the LV-BP3 group (n=3, Student-Newman-Kuels test).

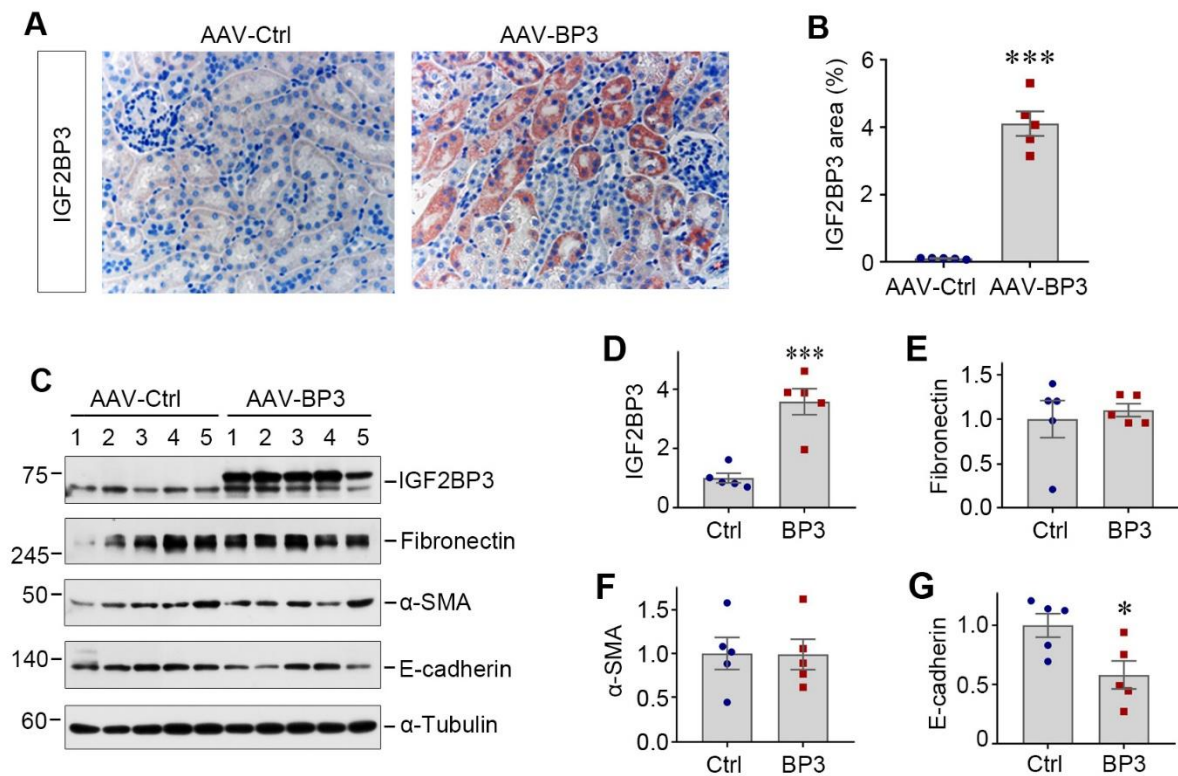

**Figure S5. Mice with overexpression of IGF2BP3 are phenotypically normal under basal condition.** (A) Representative micrographs show IGF2BP3 overexpression in renal tubular epithelium in normal mice after injection of IGF2BP3 adeno-associated virus (AAV-BP3). (B) Semi-quantitative determination of the expression of IGF2BP3 in the kidney of normal mice after injection of AAV-BP3. (C-G) Representative Western blot (C) and quantitative data show the expression of IGF2BP3 (D), fibronectin (E),  $\alpha$ -SMA (F) and E-cadherin (G) in different groups as indicated. \* $P < 0.05$ , \*\*\* $P < 0.001$  versus the sham injected with AAV-Ctrl group ( $n = 5$ ,  $t$  test).

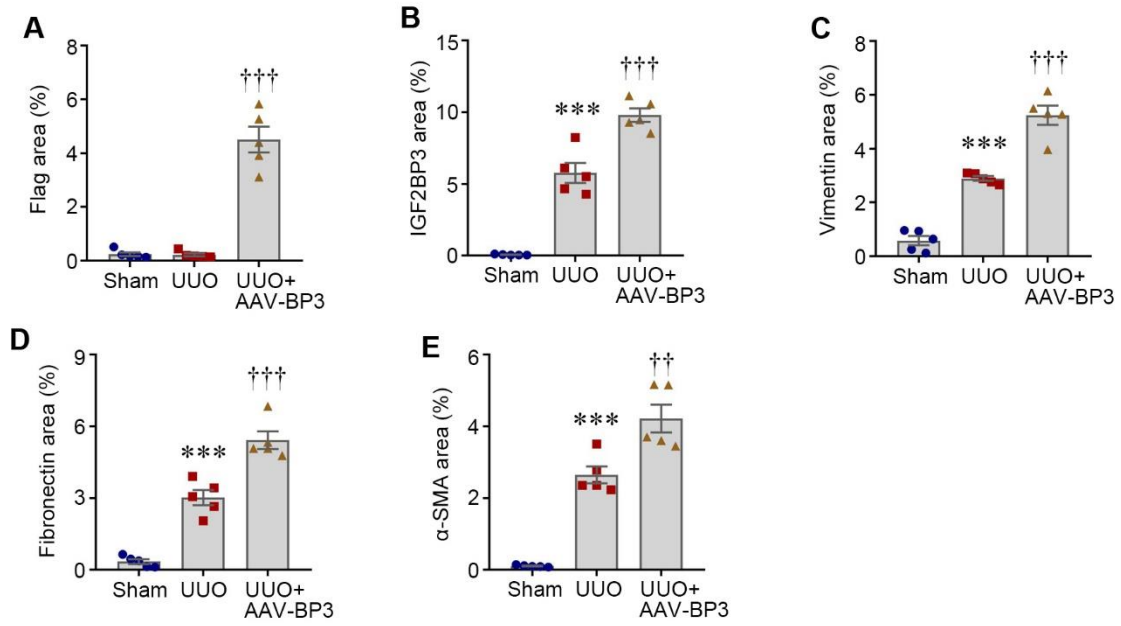

**Figure S6. Overexpression of IGF2BP3 promotes renal fibrosis after UUO.** (A-E) Semi-quantitative determination of Flag (A), IGF2BP3 (B), vimentin (C), fibronectin (D), and  $\alpha$ -SMA (E) in different groups as indicated. \*\*\* $P < 0.001$  versus the sham injected with AAV-Ctrl group; †† $P < 0.01$ , ††† $P < 0.001$  versus the UUO injected with AAV-Ctrl group (n = 5, Student-Newman-Kuels test).

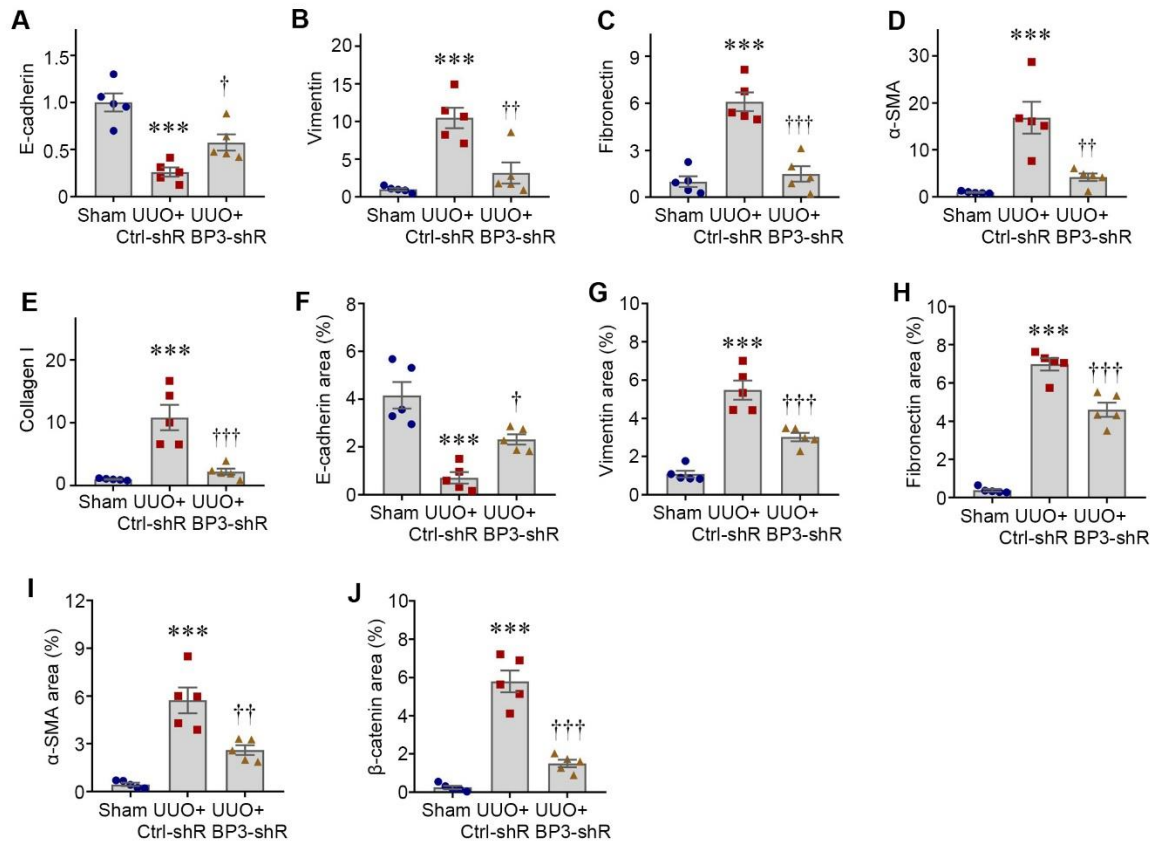

**Figure S7. Knockdown of IGF2BP3 ameliorates renal fibrosis and inhibits  $\beta$ -catenin activation after UUO.** (A-E) Quantitative data of Western blot analyses show the expression level of E-cadherin (A), vimentin (B), fibronectin (C),  $\alpha$ -SMA (D) and collagen I (E) proteins after normalization with  $\alpha$ -tubulin in different groups as indicated. \*\*\* $P < 0.001$  versus the sham group; † $P < 0.05$ , †† $P < 0.01$ , ††† $P < 0.001$  versus the UUO injected with Ctrl-shR group (n=5, Student-Newman-Kuels test). (F-J) Semi-quantitative determination of E-cadherin (F), vimentin (G), fibronectin (H),  $\alpha$ -SMA (I), and  $\beta$ -catenin (J) protein staining in different groups. \*\*\* $P < 0.001$  versus the sham group; † $P < 0.05$ , †† $P < 0.01$ , ††† $P < 0.001$  versus the UUO injected with Ctrl-shR group (n=5, Student-Newman-Kuels test).

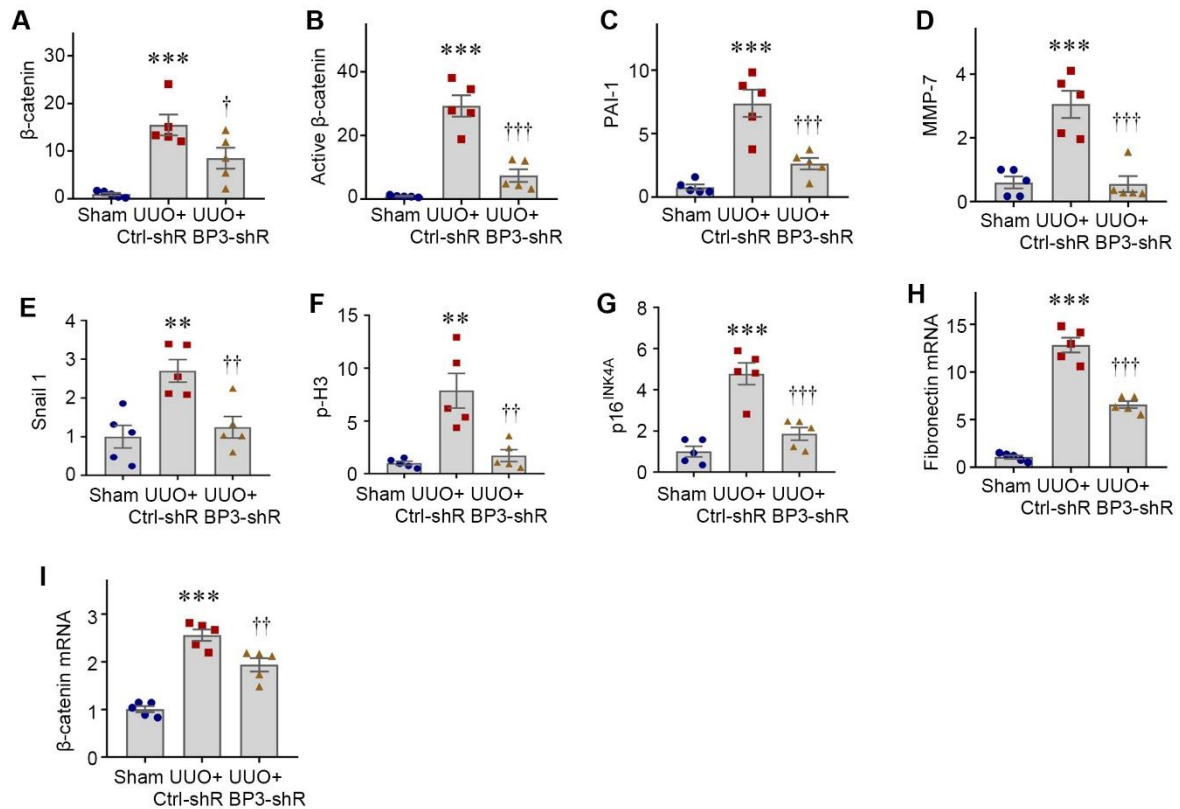

**Figure S8. Knockdown of IGF2BP3 ameliorates renal fibrosis and inhibits  $\beta$ -catenin activation after UUO.** (A-G) Quantitative data show the expression of  $\beta$ -catenin (A), active  $\beta$ -catenin (B), PAI-1 (C), MMP-7 (D), Snail 1 (E), p-H3 (F), and p16<sup>INK4A</sup> (G) in different groups as indicated. \*\* $P < 0.01$ , \*\*\* $P < 0.001$  versus the sham group; † $P < 0.05$ , †† $P < 0.01$ , ††† $P < 0.001$  versus the UUO injected with Ctrl-shR group (n=5, Student-Newman-Kuels test). (H and I) Quantitative real-time polymerase chain reaction analyses (qRT-PCR) of renal fibronectin (H) and  $\beta$ -catenin (I) mRNA expression in different groups as indicated. \*\*\* $P < 0.001$  versus the sham group; †† $P < 0.01$ , ††† $P < 0.001$  versus the UUO injected with Ctrl-shR group (n=5, Student-Newman-Kuels test).

**Table S1.** Demographic and clinical data of CKD patients.

| <b>Characteristics</b>                       | <b>CKD patients</b> |
|----------------------------------------------|---------------------|
| <b>Gender-No. (%)</b>                        |                     |
| Male                                         | 14 (56)             |
| Female                                       | 11 (44)             |
| <b>Age at entry-years</b>                    |                     |
| Mean $\pm$ SEM                               | 43.2 $\pm$ 17.1     |
| Range                                        | 18-77               |
| <b>Time from diagnosis to biopsy (month)</b> | 12.0 (3.5-24.0)     |
| <b>Scr (<math>\mu</math>mol/l)</b>           | 133.7 $\pm$ 61.3    |
| <b>eGFR (ml/min/1.73m<sup>2</sup>)</b>       | 57.5 $\pm$ 27.9     |
| <b>Pathological Diagnosis-No. (%)</b>        |                     |
| DN                                           | 4 (16)              |
| CTIN                                         | 4 (16)              |
| LN                                           | 4 (16)              |
| IgAN                                         | 5 (20)              |
| FSGS                                         | 3 (12)              |
| MN                                           | 5 (20)              |

**Table S2.** The sequences of siRNA used to silence the indicated targets in this study.

| <b>Target</b>  | <b>Species</b> | <b>Sequence</b>       |                       |
|----------------|----------------|-----------------------|-----------------------|
|                |                | <b>sense</b>          | <b>antisense</b>      |
| IGF2BP3        | Human          | GGAUUCGGAAACUUCAGAUTT | AUCUGAAGUUUCCGAAUCCTT |
| <i>Igf2bp3</i> | Mouse          | GCGGAGAAGUCCAUUACUATT | UAGUAAUGGACUUCUCGCTT  |



**Table S3.** The sources of antibodies used in this study.

| <b>Antibodies</b>            | <b>Catalogue number</b> | <b>Company</b>               | <b>Usage</b>  | <b>Location</b>       |
|------------------------------|-------------------------|------------------------------|---------------|-----------------------|
| <b>Primary antibodies</b>    |                         |                              |               |                       |
| anti-IGF2BP3                 | NBP1-84339              | Novus Biologicals            | WB/IF (Human) | Littleton, CO         |
| anti-IGF2BP3                 | Ab177477                | Abcam                        | WB/IF (Mouse) | Cambridge, MA         |
| anti-IGF2BP3                 | Ab179807                | Abcam                        | IHC           | Cambridge, MA         |
| anti-IGF2BP3                 | RN009P                  | MBL International            | RIP           | Woburn, MA            |
| anti-fibronectin             | F3648                   | Sigma-Aldrich                | WB/IHC/IF     | St. Louis, MO         |
| anti- $\alpha$ -SMA          | A2547                   | Sigma-Aldrich                | IHC           | St. Louis, MO         |
| anti- $\alpha$ -SMA          | Ab5694                  | Abcam                        | WB            | Cambridge, MA         |
| anti-collagen I              | BA0325                  | Boster Biological Technology | WB            | Wuhan, China          |
| anti-E-cadherin              | Ab76055                 | Abcam                        | WB/IHC        | Cambridge, MA         |
| anti-vimentin                | Ab92547                 | Abcam                        | WB/IHC        | Cambridge, MA         |
| anti- $\beta$ -catenin       | 610154                  | BD Biosciences               | WB/IF         | San Jose, CA          |
| anti- $\beta$ -catenin       | Ab15180                 | Abcam                        | IHC           | Cambridge, MA         |
| anti-active $\beta$ -catenin | #19807                  | Cell Signaling Technology    | WB            | Danvers, MA           |
| anti-MMP-7                   | GTX104658               | GeneTex                      | WB            | Irvine, CA            |
| anti-PAI-1                   | AF3828                  | R & D Systems                | WB            | Minneapolis, MN       |
| anti-snail 1                 | Ab180714                | Abcam                        | WB            | Cambridge, MA         |
| anti-flag                    | F1804                   | Sigma-Aldrich                | WB            | St. Louis, MO         |
| anti-flag                    | F3165                   | Sigma-Aldrich                | IHC           | St. Louis, MO         |
| anti-IGF2BP1                 | 22803-1-AP              | Proteintech                  | WB            | Rosemont, IL          |
| anti-IGF2BP2                 | 11601-1-AP              | Proteintech                  | WB/IHC        | Rosemont, IL          |
| anti-KIM-1                   | BA3537                  | Boster Biological Technology | WB            | Wuhan, China          |
| anti-p-H3                    | #9701                   | Cell Signaling Technology    | WB            | Danvers, MA           |
| anti-p16 <sup>INK4A</sup>    | Ab189034                | Abcam                        | WB            | Cambridge, MA         |
| anti-p53                     | #2524                   | Cell Signaling Technology    | WB            | Danvers, MA           |
| anti-TGF- $\beta$ 1          | Ab92486                 | Abcam                        | WB            | Cambridge, MA         |
| anti-TGF- $\beta$ RI         | Ab235178                | Abcam                        | WB            | Cambridge, MA         |
| anti-TGF- $\beta$ RII        | Sc-17791                | Santa Cruz Biotechnology     | WB            | Santa Cruz, CA        |
| anti-p-smad2                 | #3104                   | Cell Signaling Technology    | WB            | Danvers, MA           |
| anti-smad2                   | #5339                   | Cell Signaling Technology    | WB            | Danvers, MA           |
| anti-p-smad3                 | #9520                   | Cell Signaling Technology    | WB            | Danvers, MA           |
| anti-smad3                   | #9523                   | Cell Signaling Technology    | WB            | Danvers, MA           |
| anti- $\alpha$ -tubulin      | RM2007                  | Ray Antibody Biotech         | WB            | Peachtree Corners, GA |
| anti-GAPDH                   | RM2002                  | Ray Antibody Biotech         | WB            | Peachtree Corners, GA |
| anti-TBP                     | Ab818                   | Abcam                        | WB            | Cambridge, MA         |
| <b>Secondary antibodies</b>  |                         |                              |               |                       |
| Goat anti-mouse              | BA1050                  | Boster Biological Technology | WB            | Wuhan, China          |
| Goat anti-rabbit             | BA1054                  | Boster Biological Technology | WB            | Wuhan, China          |
| Rabbit anti-goat             | BA1060                  | Boster Biological Technology | WB            | Wuhan, China          |
| Donkey Anti-Mouse            | 715-065-150             | Jackson ImmunoResearch       | IHC           | West Grove, PA        |
| Donkey Anti-Rabbit           | 711-065-152             | Jackson ImmunoResearch       | IHC           | West Grove, PA        |
| Donkey Anti-Mouse            | 715-225-150             | Jackson ImmunoResearch       | IF            | West Grove, PA        |
| Donkey Anti-Rabbit           | 711-165-152             | Jackson ImmunoResearch       | IF            | West Grove, PA        |

**Table S4.** The sequences of primers used for qRT-PCR in this study.

| Gene           | Species | Primer Sequence 5' to 3' |                          |
|----------------|---------|--------------------------|--------------------------|
|                |         | Forward                  | Reverse                  |
| CTNNB1         | Human   | GCCCTGGTGAAAATGCTTGG     | CGCACTGCCATTTTAGCTCC     |
| 18S rRNA       | Human   | GCCCGAAGCGTTTACTTTGA     | TCCATTATTCCTAGCTGCGGTATC |
| ACTB           | Human   | CTCACCATGGATGATGATATCGC  | AGGAATCCTTCTGACCCATGC    |
| <i>Igf2bp3</i> | Mouse   | TGGAAGTTGAGCACTCGGTC     | ACTTGCTCACAGCTCTCCAC     |
| <i>Ctnnb1</i>  | Mouse   | ACTTGCCACACGTGCAATTC     | ATGGTGCGTACAATGGCAGA     |
| <i>Fn1</i>     | Mouse   | CTGGGTTGTTGGTGGGATGT     | TGGGTCTCCGACAGAATGC      |
| <i>Actb</i>    | Mouse   | GAGCGCAAGTACTCTGTGTG     | CGTTGCCAATAGTGATGACC     |
| <i>Gapdh</i>   | Mouse   | TGACCTCAACTACATGGTCTACA  | CTTCCCATTCTCGGCCTTG      |
